# Supplementary material for: Green synthesis of multifunctional carbon dots from coriander leaves and their potential application as antioxidants, sensors and bioimaging agents
Source: Royal Society of Chemistry journal article supplement (doi:10.1039/c5an00454c), 2015-01-01
Supplement: c5an00454c1.pdf [file c5an00454c1.pdf]

## Supplementary data

### **Green synthesis of multifunctional carbon dots from coriander leaves and their potential application as antioxidants, sensors and bioimaging agents**

Abhay Sachdev<sup>a</sup> and P.Gopinath<sup>\*a,b</sup>

*<sup>a</sup>Nanobiotechnology Laboratory, Centre for Nanotechnology,*

*Indian Institute of Technology Roorkee, Roorkee, Uttarakhand-247667, India.*

*<sup>b</sup>Department of Biotechnology,*

*Indian Institute of Technology Roorkee, Roorkee, Uttarakhand-247667, India.*

*Fax: +91-1332-273560; Tel: 91-1332-285650;*

*\*E-mail: [pgopifnt@iitr.ernet.in](mailto:pgopifnt@iitr.ernet.in), [genegopi@gmail.com](mailto:genegopi@gmail.com)*

### Quantum yield measurement of CDs

Quantum yield was calculated as reported previously (my papers), using quinine sulphate as a standard, with a known quantum yield of 0.54 at 360 nm. Following equation was used:

$$Q = Q_R \times \frac{I}{I_R} \times \frac{A_R}{A} \times \frac{\eta^2}{\eta_R^2}$$

where Q and I is the quantum yield of desired sample and measured integrated emission intensity (area under the curve), respectively.  $\eta$  and A represent refractive index being and optical density. Subscript R designates the reference fluorophore of known quantum yield. Emission range used for calculation of integrated emission intensity was 375-700 nm.

| Sample           | Integrated emission intensity ( <i>I</i> ) | Absorbance at 360 nm ( <i>A</i> ) | Refractive index of solvent ( $\eta$ ) | Quantum yield at 360 nm ( <i>Q</i> ) |
|------------------|--------------------------------------------|-----------------------------------|----------------------------------------|--------------------------------------|
| Quinine sulphate | 542308                                     | 0.1320                            | 1.33                                   | 0.54 (known)                         |
| CD               | 85962                                      | 0.1742                            | 1.33                                   | 0.0648                               |

Table S1. Quantum yield calculation of CDs.

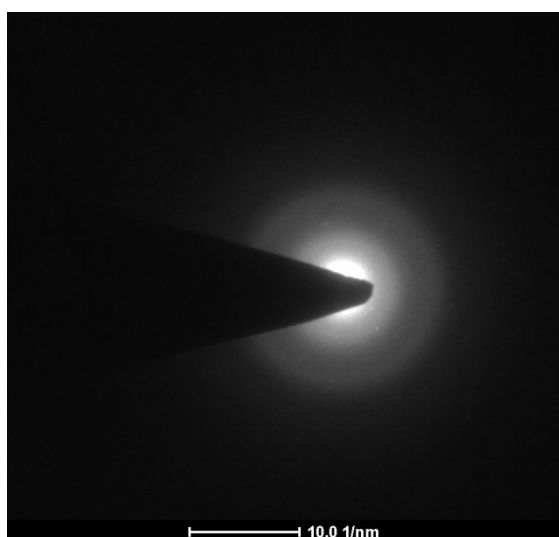

Fig. S1. SAED pattern of CDs.

|     | C (%) | H (%) | N (%) | O (%) (Calculated) | Composition                                                         |
|-----|-------|-------|-------|--------------------|---------------------------------------------------------------------|
| CDs | 50.8  | 5.3   | 4.07  | 39.83              | C <sub>4.0</sub> H <sub>5.0</sub> O <sub>2.5</sub> N <sub>0.3</sub> |

**Table S2.** Elemental analysis of as-prepared CDs.

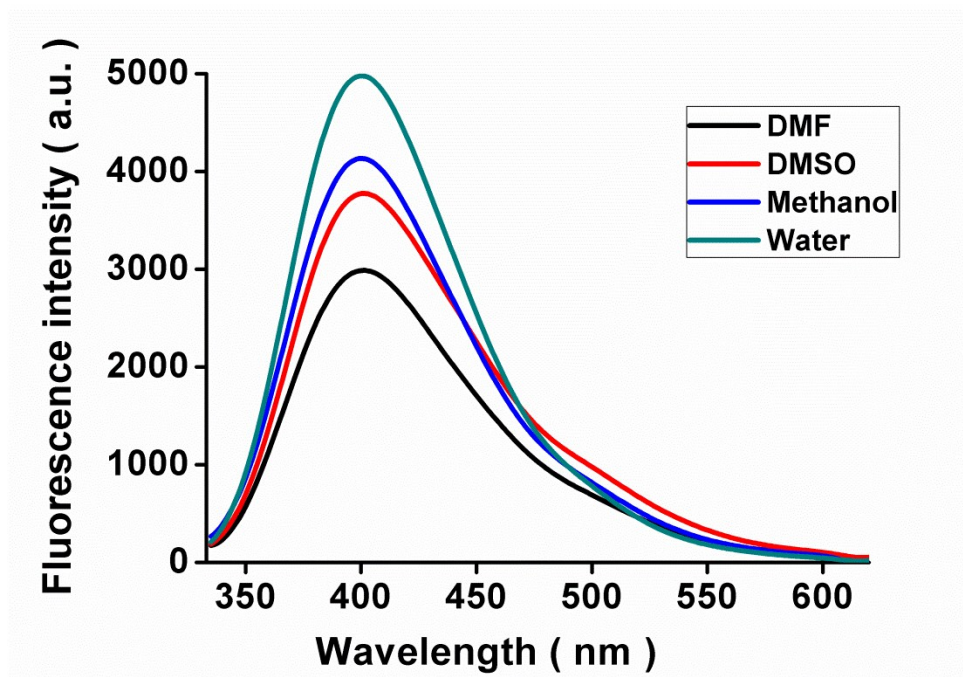

**Fig. S2.** Effect of solvents on fluorescence intensity of CDs ( $\lambda_{\text{ex}} = 320 \text{ nm}$ ).

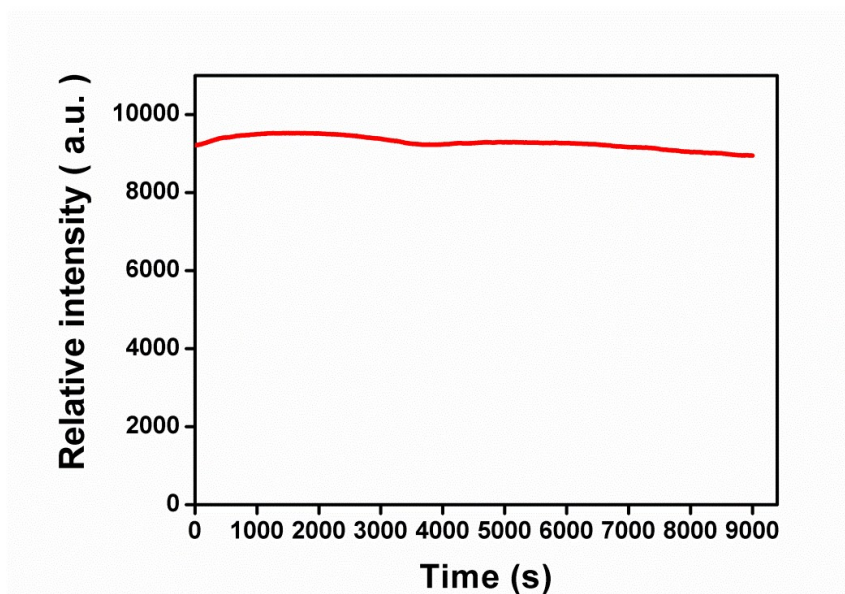

**Fig. S3.** Dependence of fluorescence emission intensity against time depicting photostability of CDs. ( $\lambda_{\text{ex}} = 320 \text{ nm}$ ;  $\lambda_{\text{em}} = 400 \text{ nm}$ ).

| Sample               | $a_1$  | $\tau_1(\text{ns})$ | $a_2$  | $\tau_2(\text{ns})$ | $a_3$  | $\tau_3(\text{ns})$ | $\tau_{\text{av}}(\text{ns})$ | $\chi^2$ |
|----------------------|--------|---------------------|--------|---------------------|--------|---------------------|-------------------------------|----------|
| CDs                  | 0.3677 | 3.211               | 0.1881 | 0.521               | 0.4442 | 10.503              | 5.943                         | 1.121    |
| CDs-Fe <sup>3+</sup> | 0.3579 | 3.071               | 0.1876 | 0.525               | 0.4545 | 10.360              | 5.906                         | 1.149    |

**Table S3.** Fluorescence lifetime calculation of CDs in presence and absence of Fe<sup>3+</sup>.

Average lifetime ( $\tau_{\text{av}}$ ) was estimated from the following equation:

$$\tau_{\text{av}} = a_1\tau_1 + a_2\tau_2 + a_3\tau_3$$

where  $\tau_1, \tau_2, \tau_3$  were the first, second and third component of the decay time of CDs and  $a_1, a_2, a_3$  were the corresponding relative weightings (emission %) of these components, respectively.

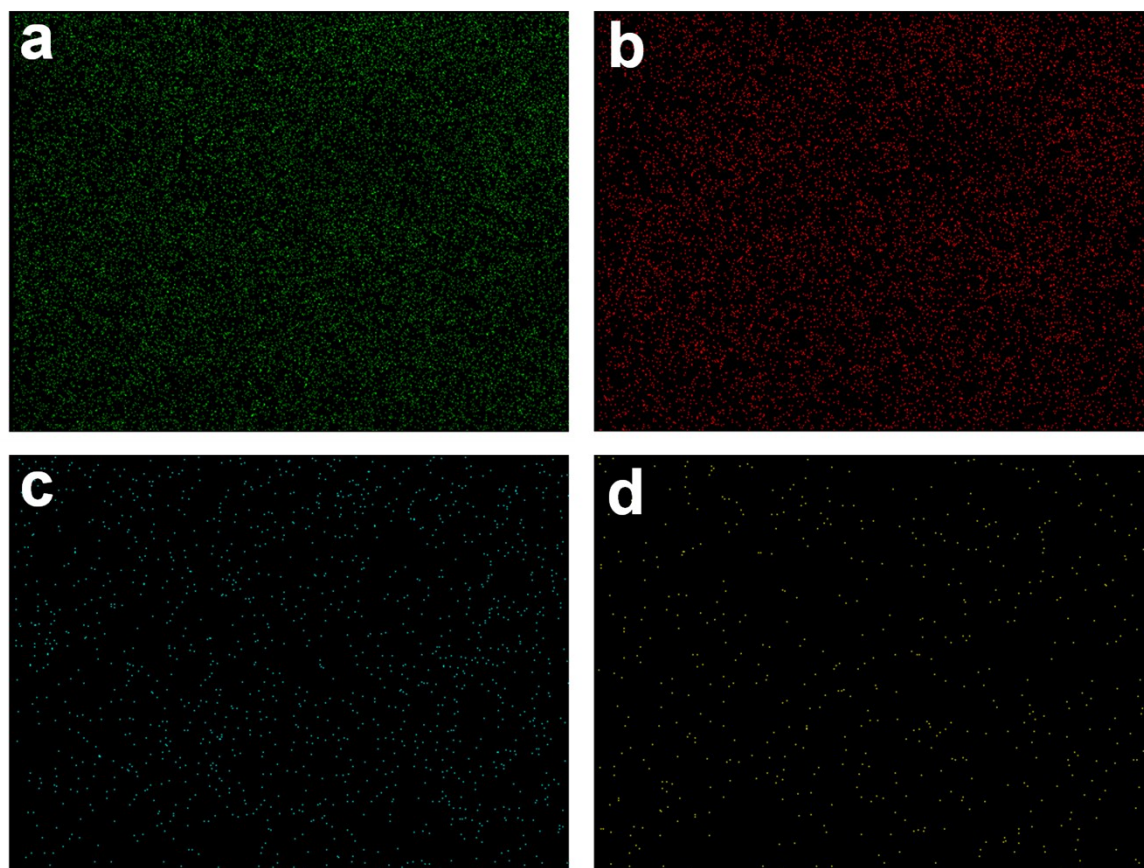

**Fig. S4.** EDS elemental mapping of CDs-Fe<sup>3+</sup>. (a-d) Individual elemental distribution (red for carbon, green for oxygen, cyan for nitrogen and yellow for iron).

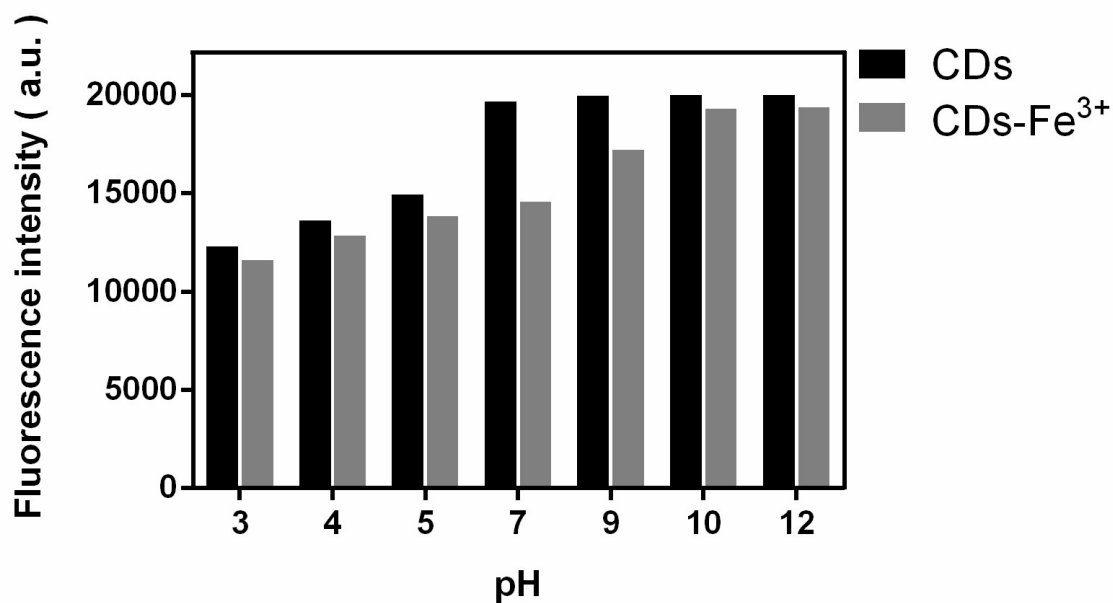

**Fig. S5.** Fluorescence response of CDs in the absence (black) and presence (grey) of 60  $\mu\text{M}$   $\text{Fe}^{3+}$  at different pH values. ( $\lambda_{\text{ex}} = 320 \text{ nm}$ ;  $\lambda_{\text{em}} = 400 \text{ nm}$ ).

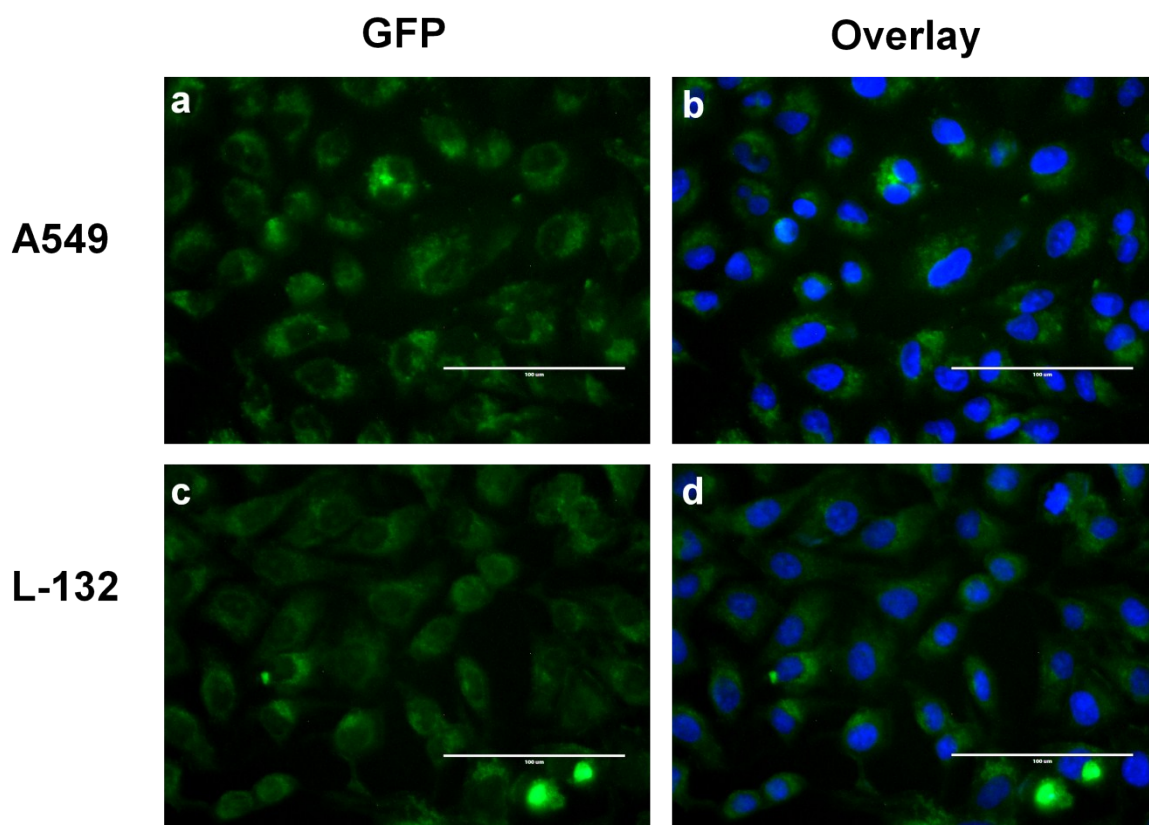

**Fig. S6.** Cellular distribution micrographs of A549 and L-132 cells treated with 0.5 mg/mL of CDs and stained with Hoechst 33342. The overlay images were acquired using a combination of DAPI (for Hoechst 33342) and GFP (for CDs) filters. Scale bar = 100  $\mu\text{m}$ .
